# Supplementary material for: Investigation by two-color IR dissociation spectroscopy of Hoogsteen-type binding in a metalated nucleobase pair mimic
Source: Royal Society of Chemistry journal article supplement (doi:10.1039/c3cp44283g), 2013-01-01

Identification by two-color IR dissociation spectroscopy  
of Hoogsteen-type binding  
in a metalated nucleobase pair mimic

Yevgeniy Nosenko, Fabian Menges, Christoph Riehn, Gereon Niedner-Schatteburg

Fachbereich Chemie and Forschungszentrum OPTIMAS, Technische Universität Kaiserslautern,  
Erwin-Schrödinger-Str. 52, Kaiserslautern 67663, Germany

Supplementary information

1. Tables

The isomer encoding and the structures of the isomers are schematically presented in Figure 2.

**Table S1.** Selected IRMPD vibrational frequencies (in cm<sup>-1</sup>) and corresponding values calculated for the 4 lowest energy isomers of [Ag<sub>2</sub>(1MT-H)(DDA)]<sup>+</sup> at the B3LYP/aug-cc-pVDZ level and scaled by 0.986 and 0.959 below and above 2000 cm<sup>-1</sup>, respectively.

| IRMPD | 1a   | 1b   | 1c   | 1d   | Assignment                                |
|-------|------|------|------|------|-------------------------------------------|
| 3483  | 3480 | 3479 | 3480 | 3480 | v(NH)                                     |
| 3364  | 3388 | 3388 | 3388 | 3390 | v <sub>a</sub> (NH <sub>2</sub> )         |
| 3302  | 3316 | 3318 | 3317 | 3321 | v <sub>s</sub> (NH <sub>2</sub> )         |
| 3136  | 3135 | 3138 | 3135 | 3138 | v(C8H)                                    |
| 1648  | 1650 | 1652 | 1630 | 1629 | v(CO <sup>nc</sup> )                      |
| 1510  | 1509 | 1510 | 1535 | 1539 | v(CO <sup>Ag</sup> )                      |
| 138   | 141  | 142  | 95   | 90   | v(CO <sup>nc</sup> )-v(CO <sup>Ag</sup> ) |

**Table S2.** Relative and stabilization energies ( $E_{\text{rel}}$ ,  $\Delta E_i$  in kJ/mol), selected bond lengths (in pm) and angles (in degrees) calculated at the B3LYP/aug-cc-pVDZ level of theory for the isomeric  $[\text{Ag}_2(1\text{MT-H})(\text{DDA})]^+$  metal base pairs and 1MT monomer.

| Species | $E_{\text{rel}}$ | $\Delta E_1^{[a]}$ | $\Delta E_2^{[a]}$ | C4O | C4N3 | N3C2 | C2O | AgAg | Dihedral <sup>[b]</sup> |
|---------|------------------|--------------------|--------------------|-----|------|------|-----|------|-------------------------|
| 1a      | 0                | -237               | -235               | 128 | 136  | 138  | 124 | 288  | 13.0                    |
| 1b      | 1                |                    | -233               | 128 | 136  | 138  | 124 | 289  | 13.6                    |
| 1c      | 10               | -227               | -224               | 124 | 139  | 134  | 128 | 291  | 13.0                    |
| 1d      | 11               |                    | -223               | 124 | 139  | 134  | 128 | 292  | 13.8                    |
| 2a      | 14               |                    | -221               | 127 | 136  | 134  | 127 | 344  | 33.7                    |
| 2b      | 19               |                    | -216               | 128 | 135  | 134  | 127 | 383  | 35.5                    |
| 1MT     | --               |                    |                    | 123 | 140  | 138  | 122 | --   | --                      |
| 3       | 97               | -115               |                    | 133 | 133  | 137  | 125 | 288  | 12.9                    |
| 4a      | 123              | -89                |                    | 133 | 133  | 137  | 125 | 288  | 13.0                    |
| 4b      | 125              | -87                |                    | 133 | 133  | 137  | 125 | 289  | 14.7                    |
| 5a      | 147              | -64                |                    | 125 | 138  | 137  | 125 | 419  | 25.7                    |
| 5b      | 148              | -64                |                    | 125 | 139  | 137  | 125 | 420  | 26.6                    |
| 6a      | 152              | -60                |                    | 125 | 139  | 132  | 133 | 287  | 12.3                    |
| 6b      | 156              | -56                |                    | 125 | 139  | 132  | 133 | 288  | 15.0                    |

[a] the stabilization energies  $\Delta E_1$  and  $\Delta E_2$  were calculated for the fragmentation channels characterized by neutral losses of 1MT and 1M3AgT, respectively; [b] the dihedral angle between the bases is defined by the four atoms coordinated to the silver ions

**Table S3.** A comparison of selected bond lengths (in pm) and angles (in degrees) calculated for the isomer **1a** of  $[\text{Ag}_2(1\text{MT-H})(\text{DDA})]^+$  at the B3LYP/aug-cc-pVDZ level and of  $[\text{Ag}_2(\text{T-H})(\text{DDA})]^+$  at BLYP-D/TZ2P level.

| methods               | C <sub>4</sub> O | C <sub>4</sub> N <sub>3</sub> | N <sub>3</sub> C <sub>2</sub> | C <sub>2</sub> O | $\angle \text{N}_3\text{N}_7\text{N}_8\text{O}_4$ | $\angle \text{N}_3\text{AgN}_7$ | $\angle \text{N}_8\text{AgO}_4$ | AgAg | (T)N <sub>3</sub> Ag | (A)N <sub>7</sub> Ag | N <sub>8</sub> Ag | O <sub>4</sub> Ag |
|-----------------------|------------------|-------------------------------|-------------------------------|------------------|---------------------------------------------------|---------------------------------|---------------------------------|------|----------------------|----------------------|-------------------|-------------------|
| B3LYP                 | 128              | 136                           | 138                           | 124              | 13.0                                              | 170.3                           | 168.2                           | 288  | 214                  | 215                  | 222               | 212               |
| BLYP-D <sup>[a]</sup> | 129              | 137                           | 139                           | 123              | 14.9                                              | 169.1                           | 169.4                           | 287  | 214                  | 216                  | 222               | 211               |

[a] Ref. 16: D. A. Megger, C. F. Guerra, J. Hoffmann, B. Brutschy, F. M. Bickelhaupt and J. Mueller, *Chemistry-a European Journal*, 2011, **17**, 6533-6544

## 2. IRMPD and calculated IR spectra of the isomeric metal base pairs

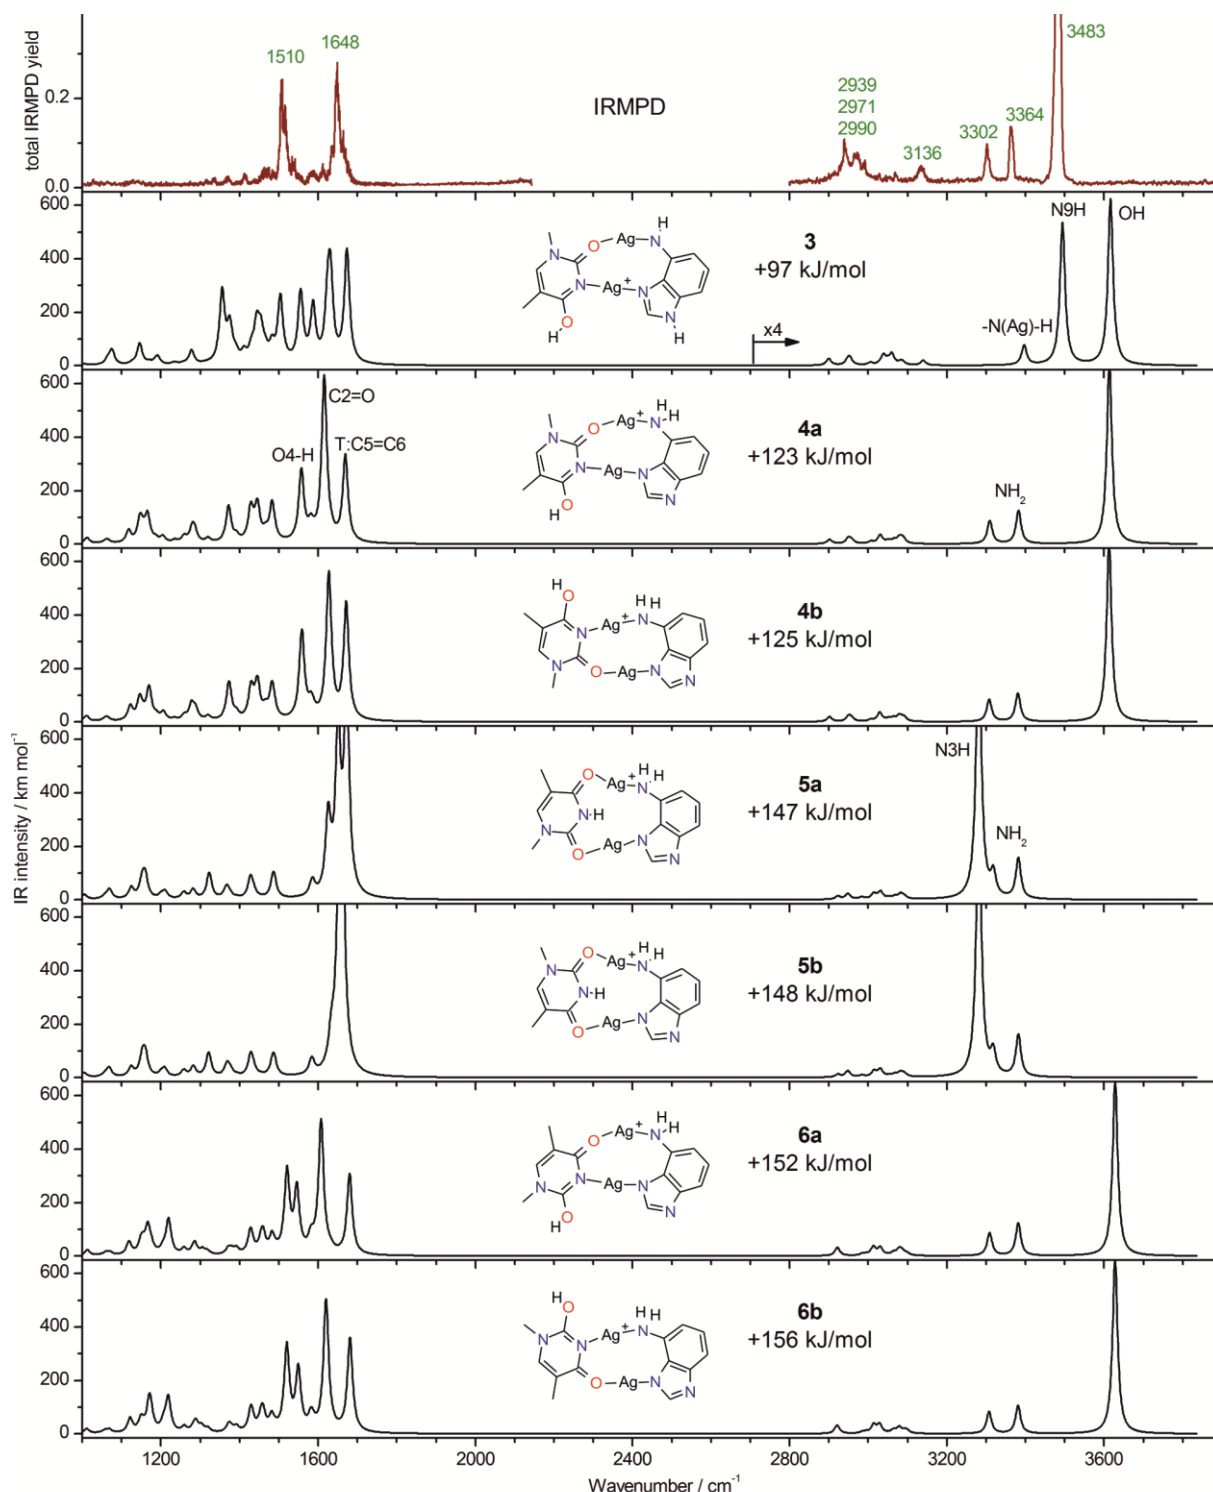

**Figure S1.** Experimental IRMPD and linear IR spectra of the less stable tautomers of the  $[\text{Ag}_2(1\text{MT-H})(\text{DDA})]^+$  metal base pair calculated at the B3LYP/aug-cc-pVDZ level. The theoretical spectra are simulated using a Lorentzian line shape of 16  $\text{cm}^{-1}$  FWHM. The isomer encoding as well as the corresponding relative energies in  $\text{kJ/mol}$  are indicated. Some major vibrational modes are assigned.

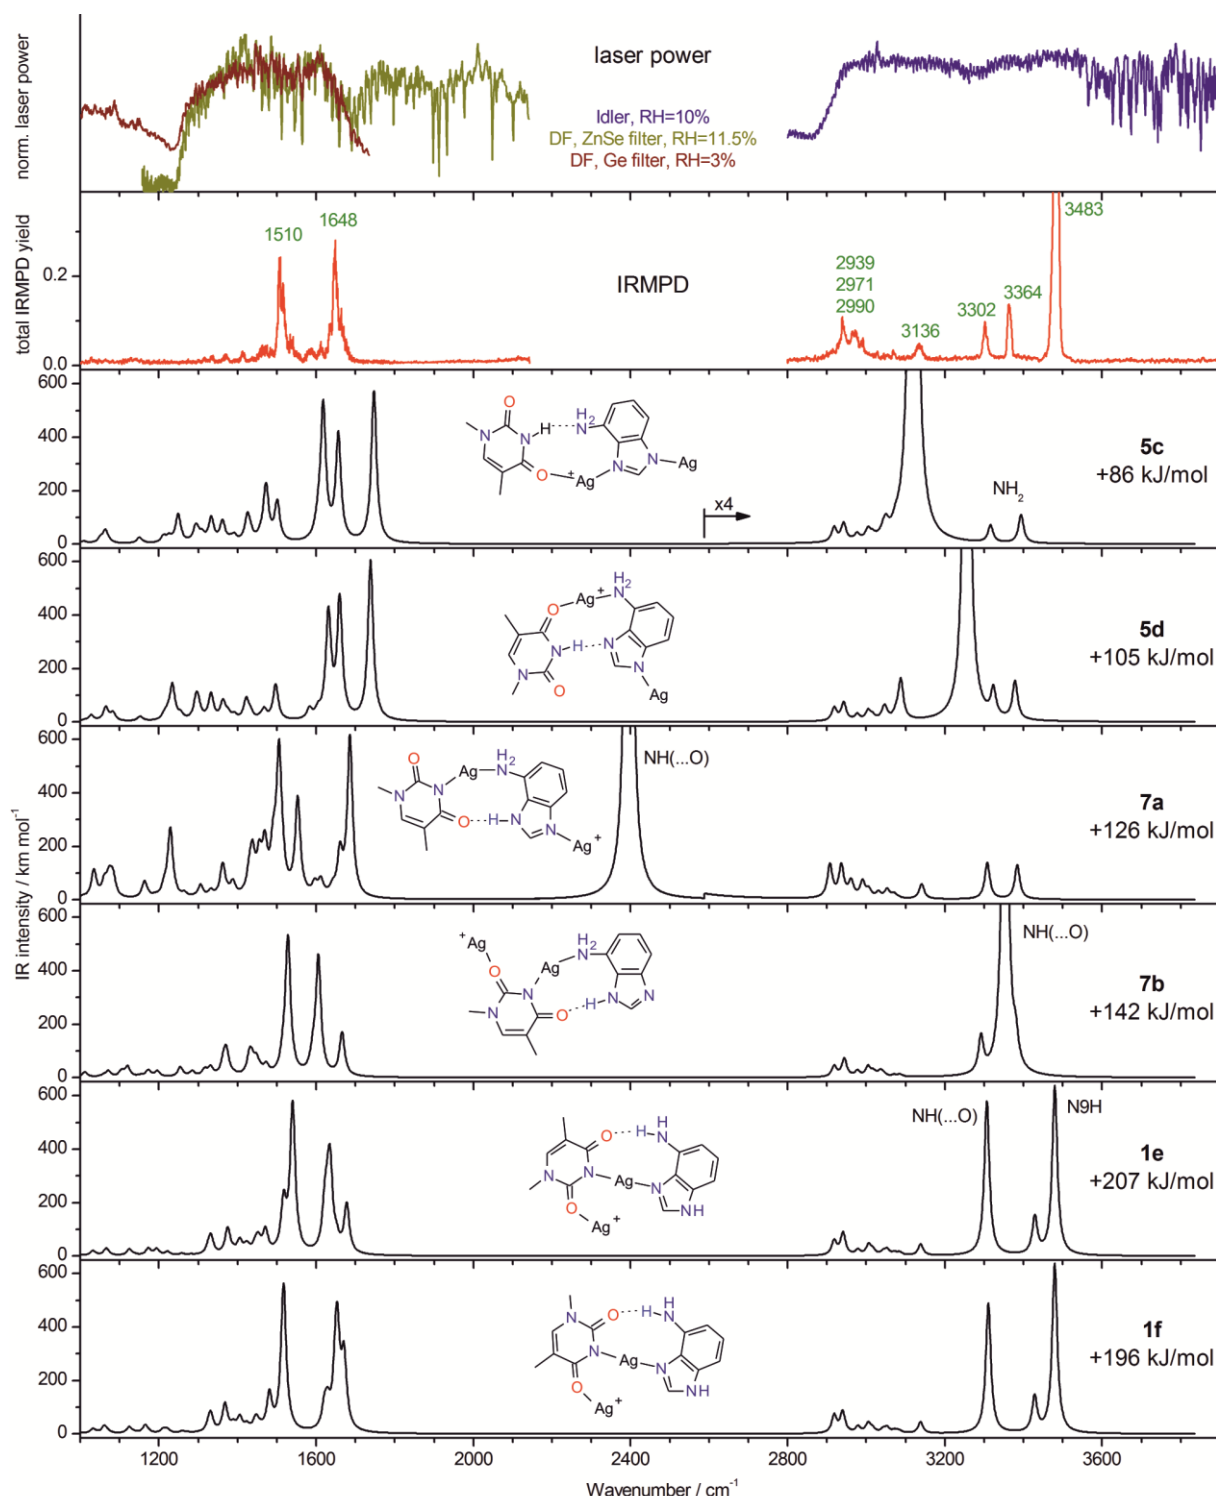

**Figure S2.** Experimental IRMPD and linear IR spectra of hydrogen bonded tautomeric isomers of the  $[\text{Ag}_2(1\text{MT-H})(\text{DDA})]^+$  metal base pair (B3LYP/aug-cc-pVDZ). The theoretical spectra are simulated using a Lorentzian line shape of  $16\text{ cm}^{-1}$  FWHM. The isomer encoding as well as the corresponding relative energies in kJ/mol are given on the right side. Localization of the essential calculated vibrational modes is indicated.

### 3. Mass spectra

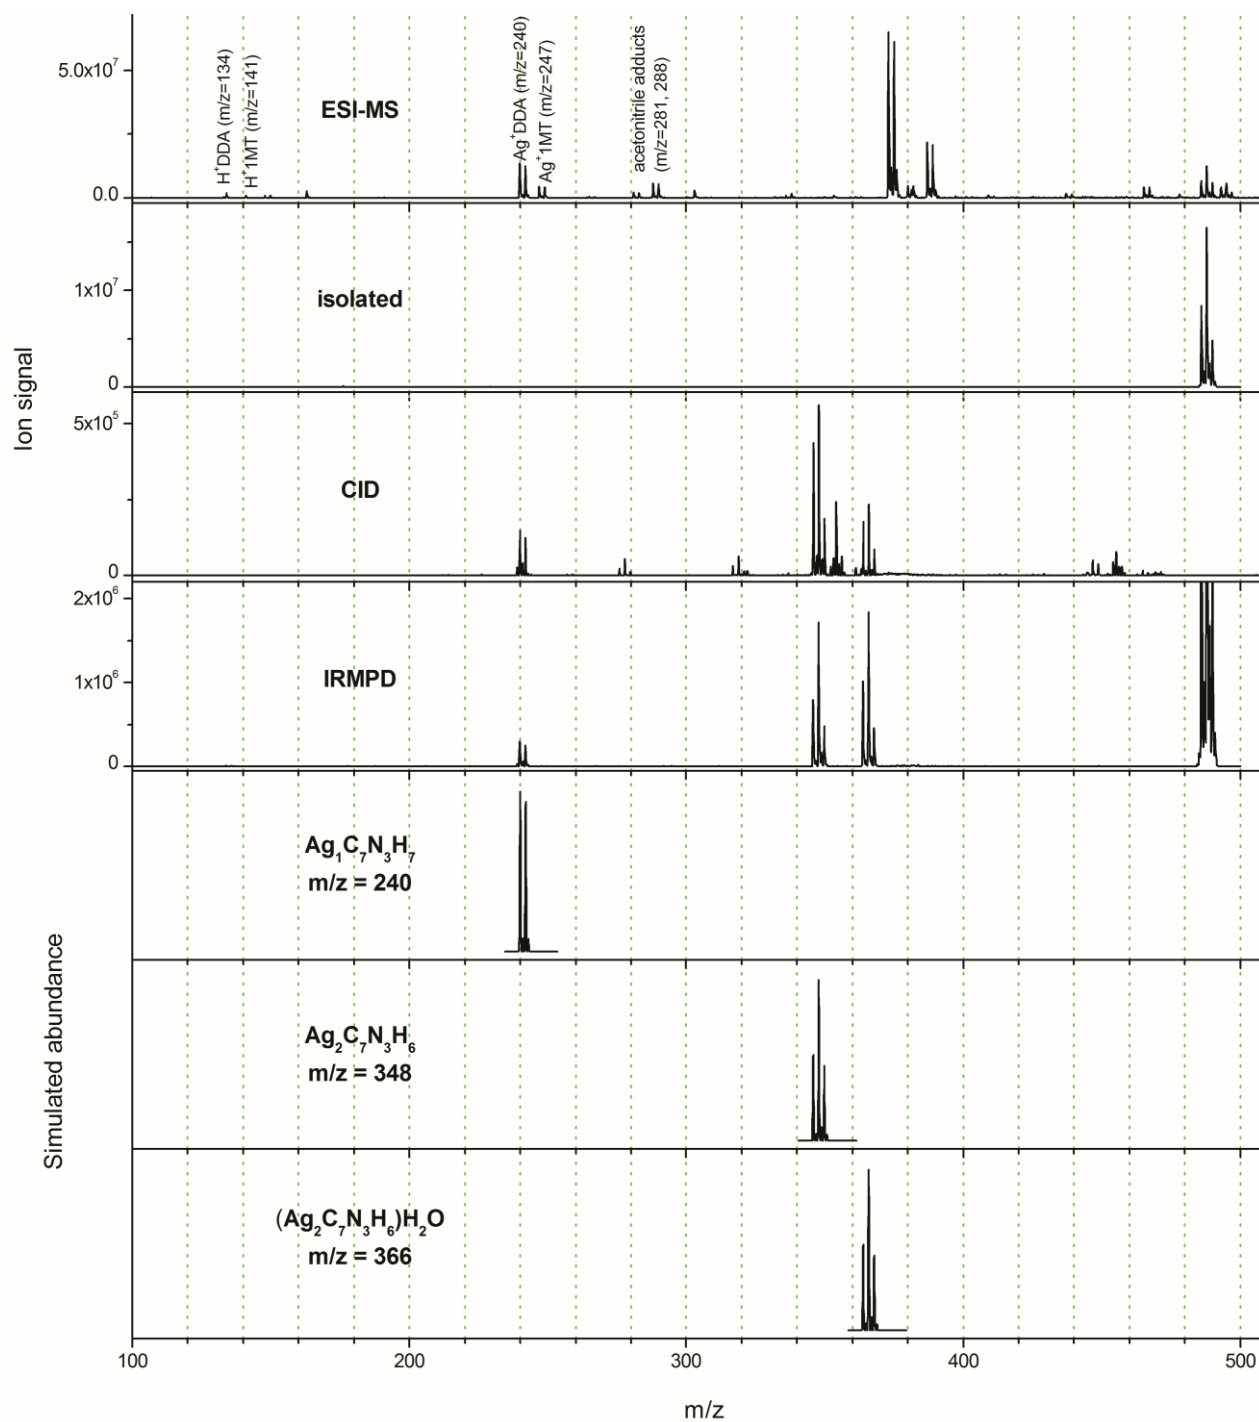

**Figure S2.** ESI mass spectra measured before and after either collision induced dissociation (CID) or IR irradiation (integrated over the band at  $3483\text{ cm}^{-1}$ ) as well as simulated  $m/z$  patterns of the observed fragments. The most abundant  $m/z$  values are indicated.

## 4. Experimental

**Figure S3.** IR beam path in the modified 3D quadrupole ion trap: RE – ring electrode with a symmetric pair of openings of 2 mm in diameter, M1/M2 – silver mirrors, W1/W2 – BaF<sub>2</sub> entrance/exit windows.

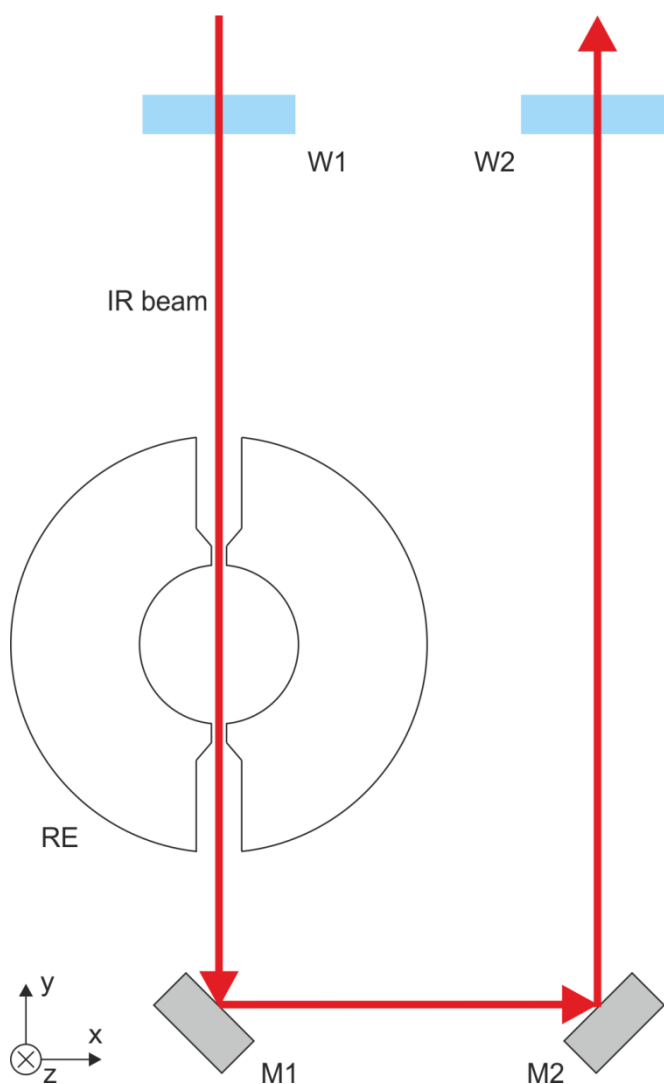

Supplement: c3cp44283g.pdf [file c3cp44283g.pdf]
